# Supplementary material for: Acetaminophen and caffeine removal by MnOx(s) and GAC media in column experiments
Source: Royal Society of Chemistry journal article supplement (doi:10.1039/d0ew00689k), 2020-11-10
Supplement: d0ew00689k1.pdf [file d0ew00689k1.pdf]

Supplementary Information

# Acetaminophen and Caffeine Removal By $\text{MnO}_{x(s)}$ and GAC Media in Column Experiments

*Rachael Miera<sup>1</sup>, Nabil Shaikh<sup>1</sup>, Kateryna Artyushkova<sup>2</sup>, Abdul-Mehdi Ali<sup>3</sup>, Carlo Santoro<sup>4</sup>,*

*Bruce M. Thomson<sup>1</sup>, Kerry J. Howe<sup>1</sup>, and José M. Cerrato<sup>1\*</sup>*

\* Corresponding authors' email address: [jcerrato@unm.edu](mailto:jcerrato@unm.edu)

<sup>1</sup> Department of Civil, Construction, & Environmental Engineering, MSC01 1070, University of New Mexico, Albuquerque, New Mexico 87131, USA

<sup>2</sup> Department of Chemical & Biological Engineering, MSC01 1120, 1 University of New Mexico Albuquerque, NM 87131, USA

<sup>3</sup> Department of Earth and Planetary Sciences, MSC03 2040, University of New Mexico, Albuquerque, New Mexico 87131, USA

<sup>4</sup> Department of Chemical Engineering and Analytical Science, The University of Manchester, The Mill, Sackville Street, M13AL Manchester, UK

Manuscript to be submitted to Environmental Science: Water Research & Technology

**Table S1.** Energy dispersive X-ray spectroscopy (EDX) components for unreacted and reacted MnO<sub>x</sub>(s) and GAC from column experiments in series.

| Element | % Weight Content                 |                                  |                  |                |
|---------|----------------------------------|----------------------------------|------------------|----------------|
|         | Ureacted<br>MnO <sub>x</sub> (s) | Reacted<br>MnO <sub>x</sub> (s). | Unreacted<br>GAC | Reacted<br>GAC |
| C       | 0.236                            | 0.379                            | 93.170           | 84.065         |
| O       | 42.272                           | 52.132                           | 6.830            | 12.088         |
| Al      | 5.969                            | 13.609                           | B.D.             | 0.739          |
| Si      | 3.941                            | 12.248                           | B.D.             | 1.449          |
| Mn      | 47.582                           | 20.279                           | B.D.             | B.D.           |
| K       | B.D. <sup>a</sup>                | 1.353                            | B.D.             | B.D.           |
| Ca      | B.D.                             | B.D.                             | B.D.             | 0.828          |
| Mg      | B.D.                             | B.D.                             | B.D.             | 0.831          |

B.D.<sup>a</sup> = Below Detection

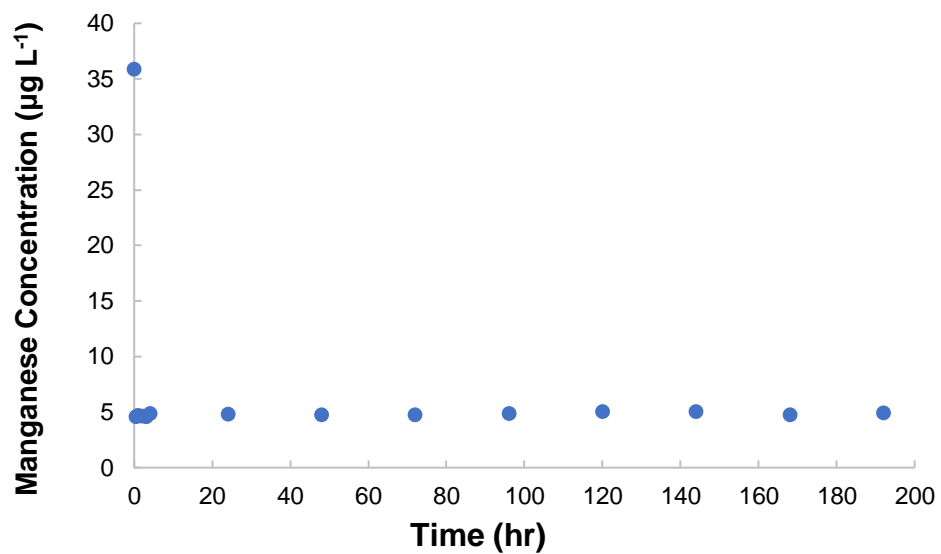

**Figure S1.** Effluent manganese (Mn) concentrations for 100% MnOx media column.

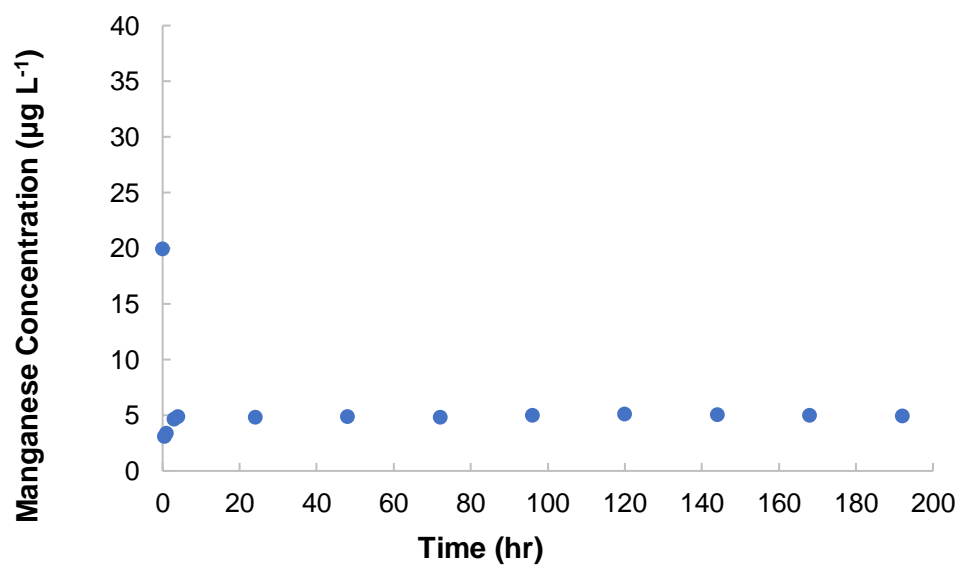

**Figure S2.** Effluent manganese (Mn) concentration for 50% MnOx/50% GAC media column.

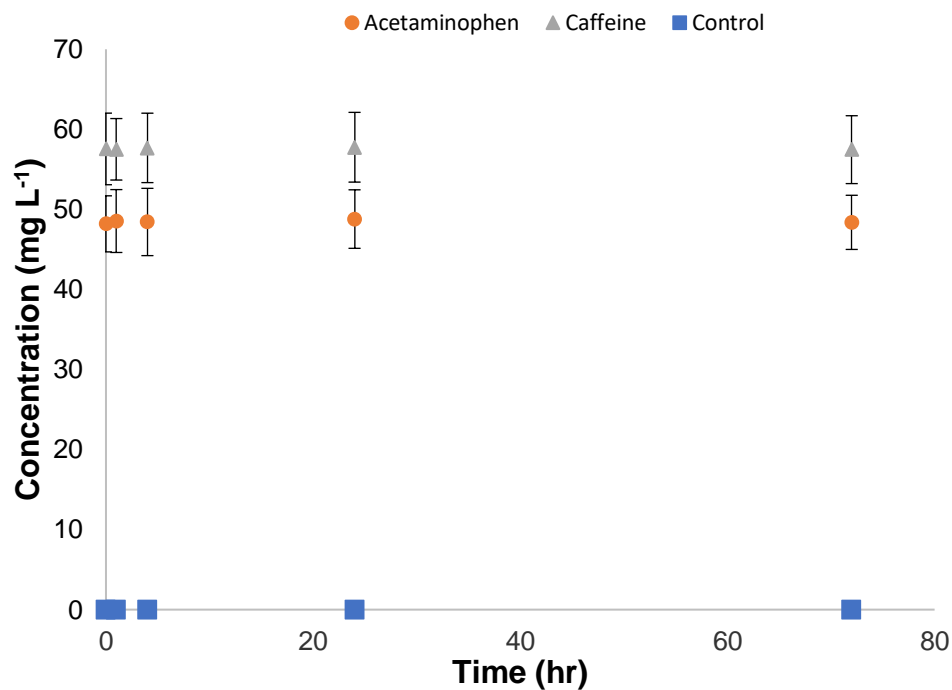

**Figure S3.** Results for acetaminophen and caffeine concentration over 72 hours for the spiked tap water batch experiment. The initial concentration of the acetaminophen and caffeine solution was 50 mg L<sup>-1</sup>. The negative control was contained 50 mL of tap water with no spiked acetaminophen and caffeine. Error bars represent the standard deviation of the average.

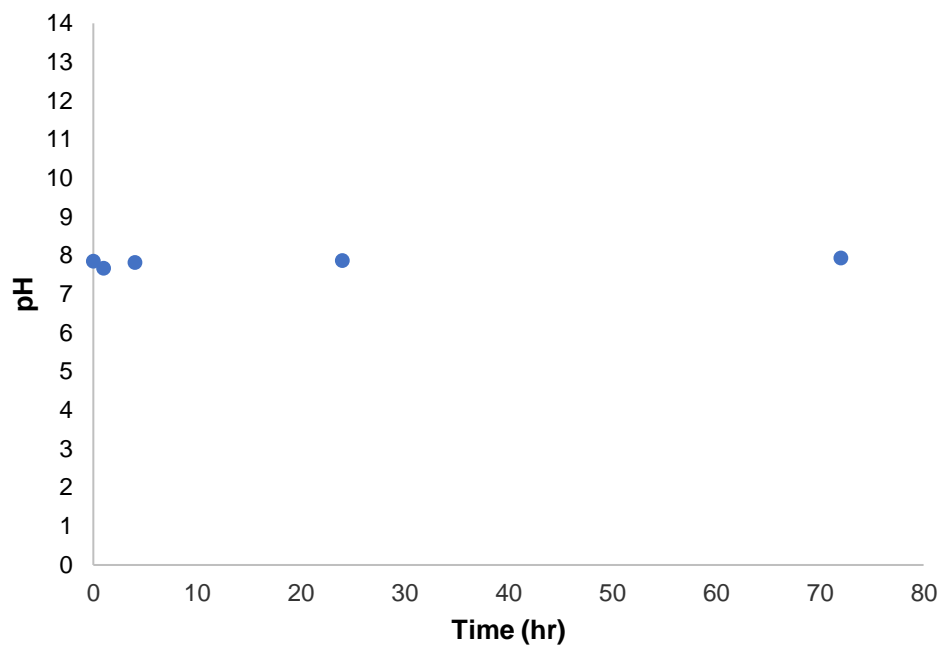

**Figure S4.** Spiked tap water batch experiment pH over 72 hours.

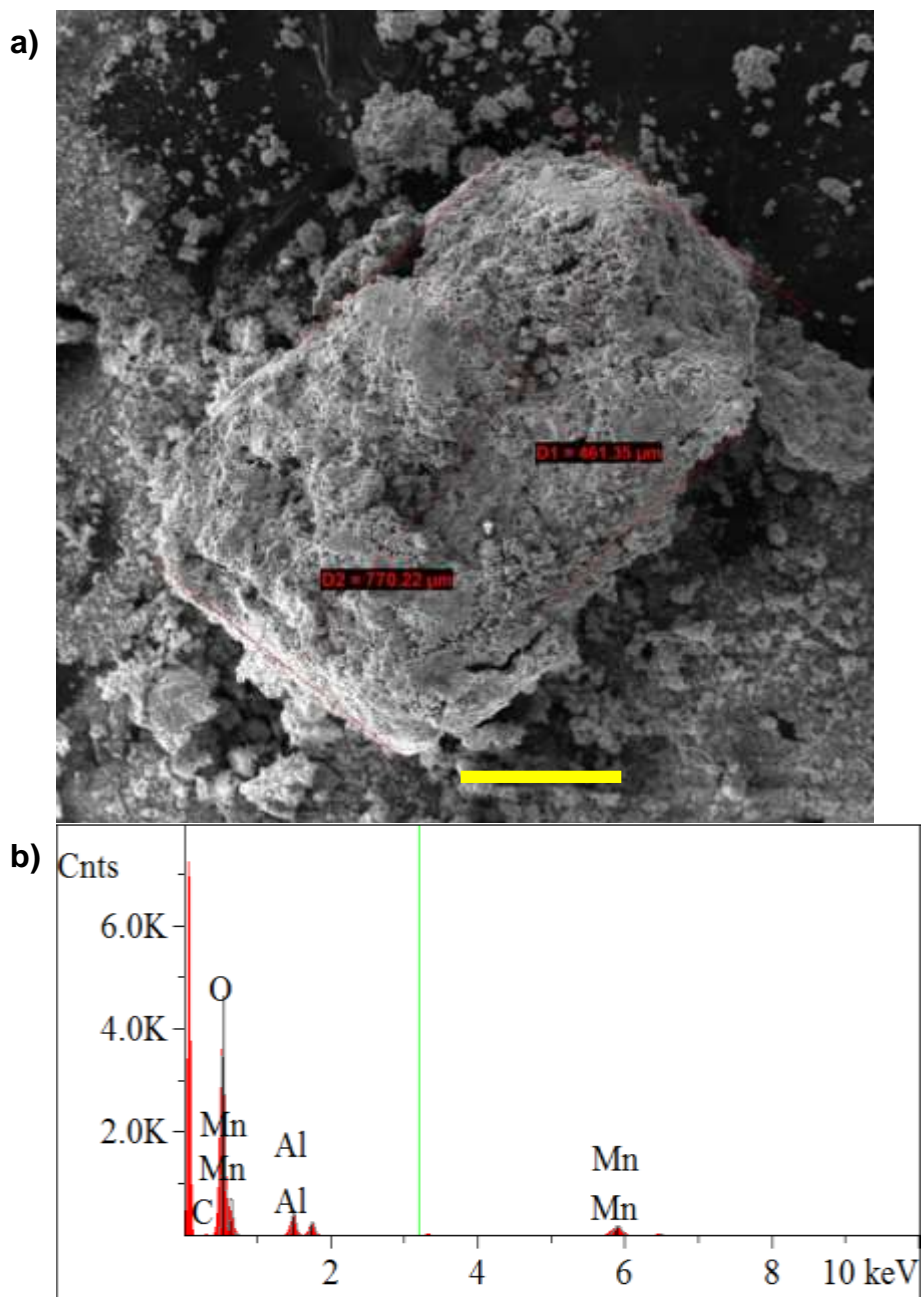

**Figure S5.** a) Scanning electron microscopy (SEM) imaging of unreacted  $\text{MnO}_x(\text{s})$ ; b) Energy dispersive X-ray spectroscopy (EDX) spectrum for unreacted  $\text{MnO}_x(\text{s})$ .

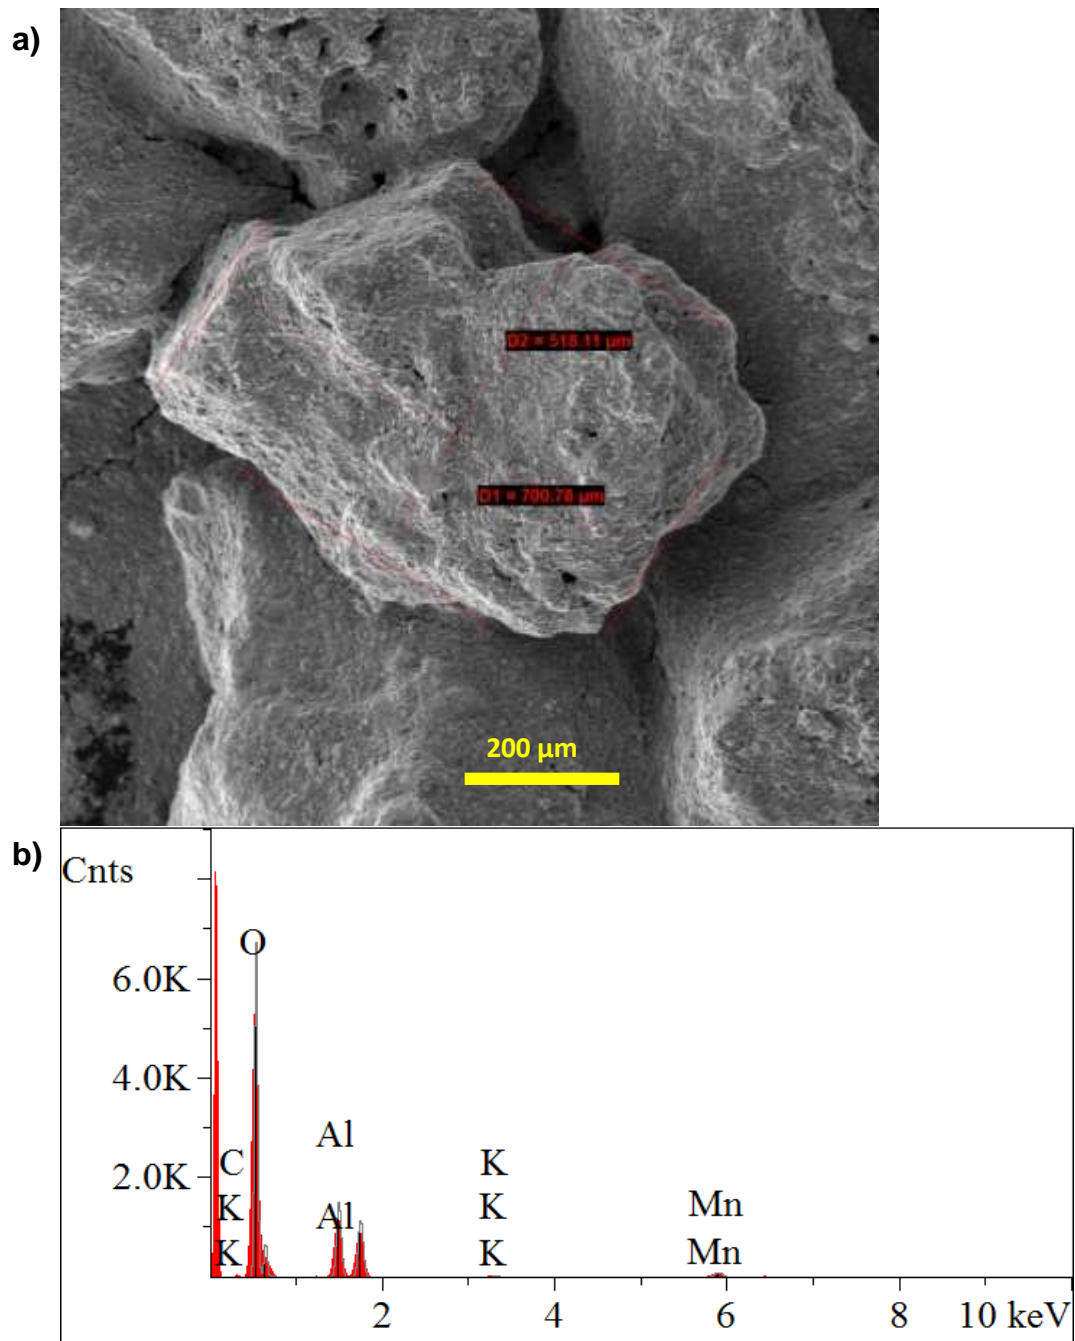

**Figure S6. a)** Scanning electron microscopy (SEM) imaging of reacted  $\text{MnO}_x(\text{s})$ ; **b)** Energy dispersive X-ray spectroscopy (EDX) spectrum for reacted  $\text{MnO}_x(\text{s})$  media.

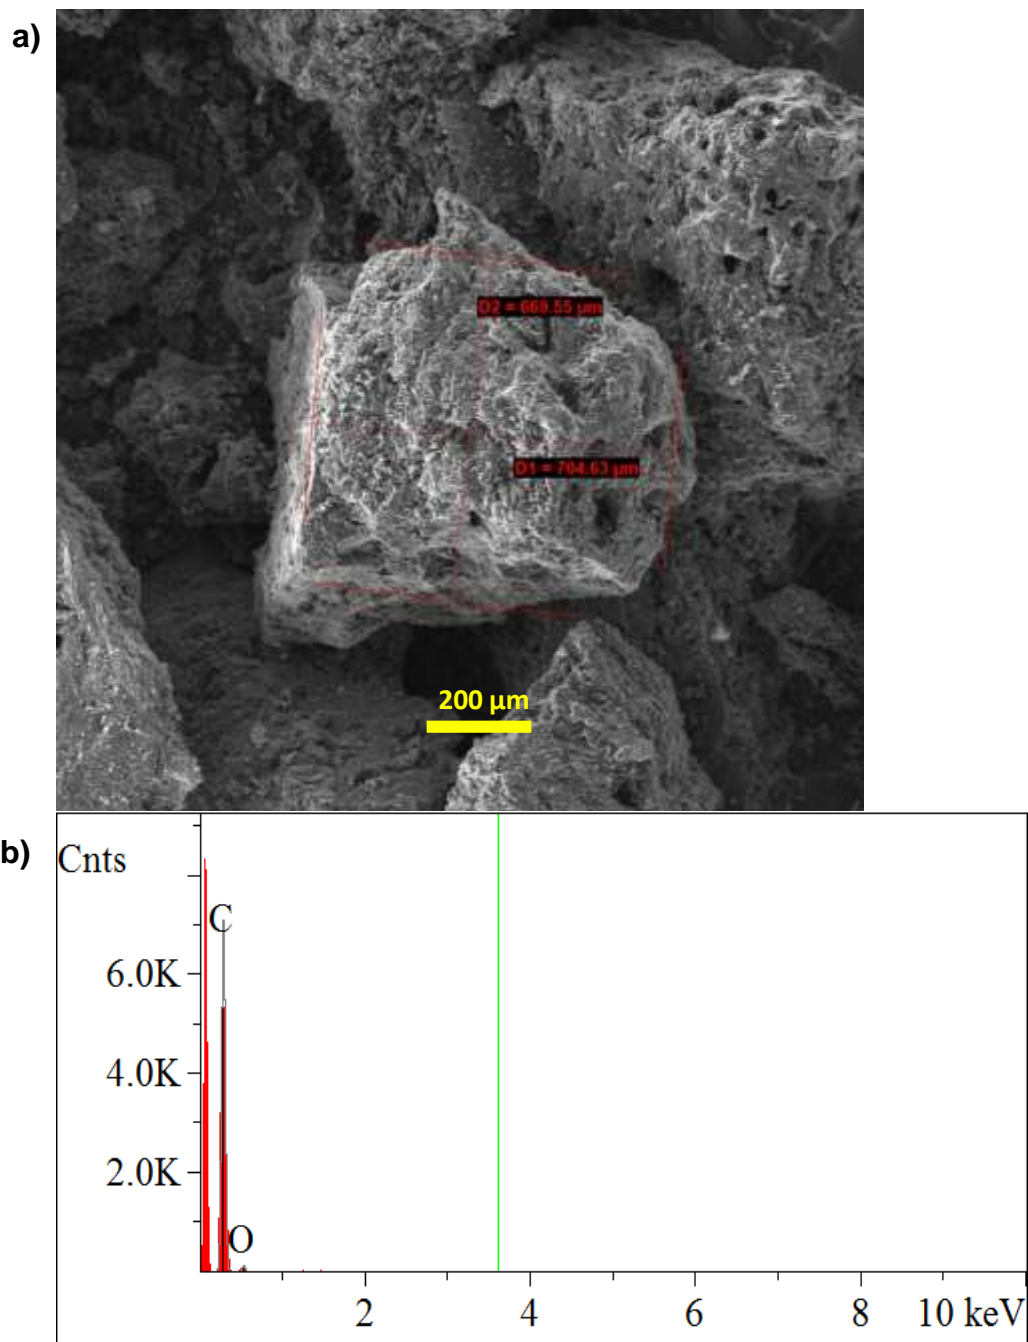

**Figure S7.** a) Scanning electron microscopy (SEM) imaging of unreacted GAC; b) Energy dispersive X-ray spectroscopy (EDX) spectrum for unreacted GAC media.

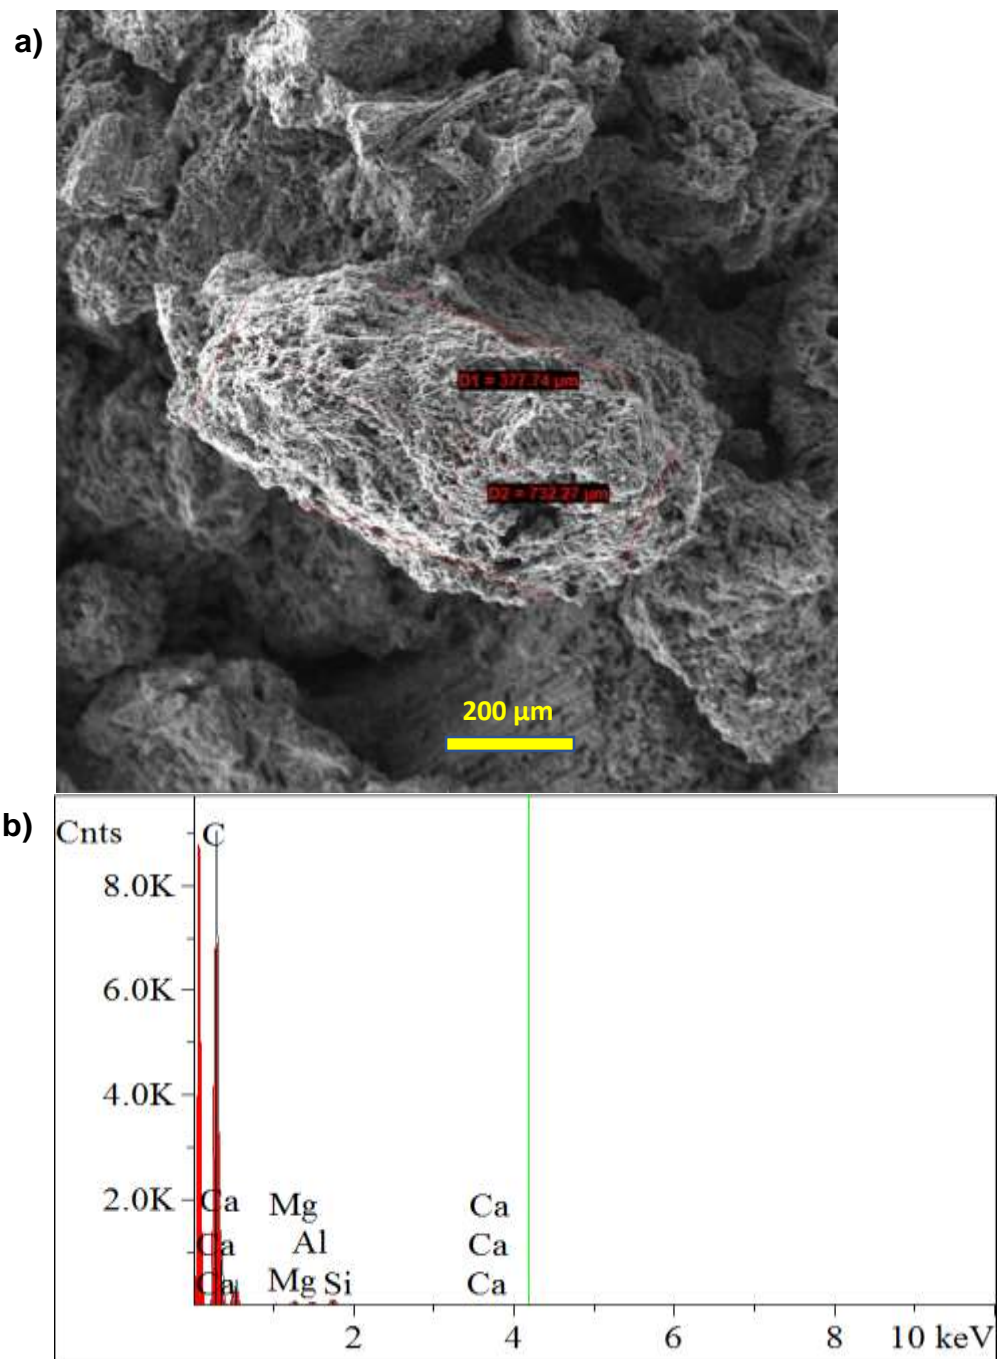

**Figure S8.** a) Scanning electron microscopy (SEM) image of reacted GAC; b) Energy dispersive X-ray spectroscopy (EDX) for reacted GAC media.
